# Supplementary material
Source: PubMed Central journal article supplement (PMC5737576)
Supplement: nox085_suppl_supplemental_figure_2.pdf [file nox085_suppl_supplemental_figure_2.pdf]

CCCCGGCGCAGCGCGGCCGCAGCAGCCTCCGCCCCCCGCACGGTGTGAGCGCCCGACGC  
GGCCGAGGCGGCCGGAGTCCCGAGCTAGCCCCGGCGGCCGCGCCGCCCAGACCGGACG  
ACAGGCCACCTCGTCGGCGTCCGCCCGAGTCCCCGCCCTCGCCGCCAACGCCACAACCAC  
CGCGCACGGCCCCCTGACTCCGTCCAGTATTGATCGGGAGAGCCGGAGCGAGCTCTTCG  
GGGAGCAGCGATGCGACCCTCCGGGACGGCCGGGGCAGCGCTCCTGGCGCTGCTGGCTG  
CGCTCTGCCCGGCGAGTCGGGCTCTGGAGGAAAAGAAAGTTTGCCAAGGCACGAGTAAC  
AAGCTCACGCAGTTGGGCAC TTTGAAGATCATTTTCTCAGCCTCCAGAGGATGTTCAA  
TAACTGTGAGGTGGTCCTTGGGAATTTGGAAATTACCTATGTGCAGAGGAATTATGATC  
TTCCTTCTTAAAGACCATCCAGGAGGTGGCTGGTTATGTCCTCATGCTCTACAACCC  
ACCACGTACCAGATGGATGTGAACCCCGAGGGCAAATACAGCTTTGGTGCCACCTGCGT  
GAAGAAGTGTCCCCGTAATTATGTGGTGACAGATCACGGCTCGTGCGTCCGAGCCTGTG  
GGGCCGACAGCTATGAGATGGAGGAAGACGGCGTCCGCAAGTGTAAGAAGTGCGAAGGG  
CCTTGCCGCAAAG
