# Supplementary material
Source: PubMed Central journal article supplement (PMC5737576)

**A**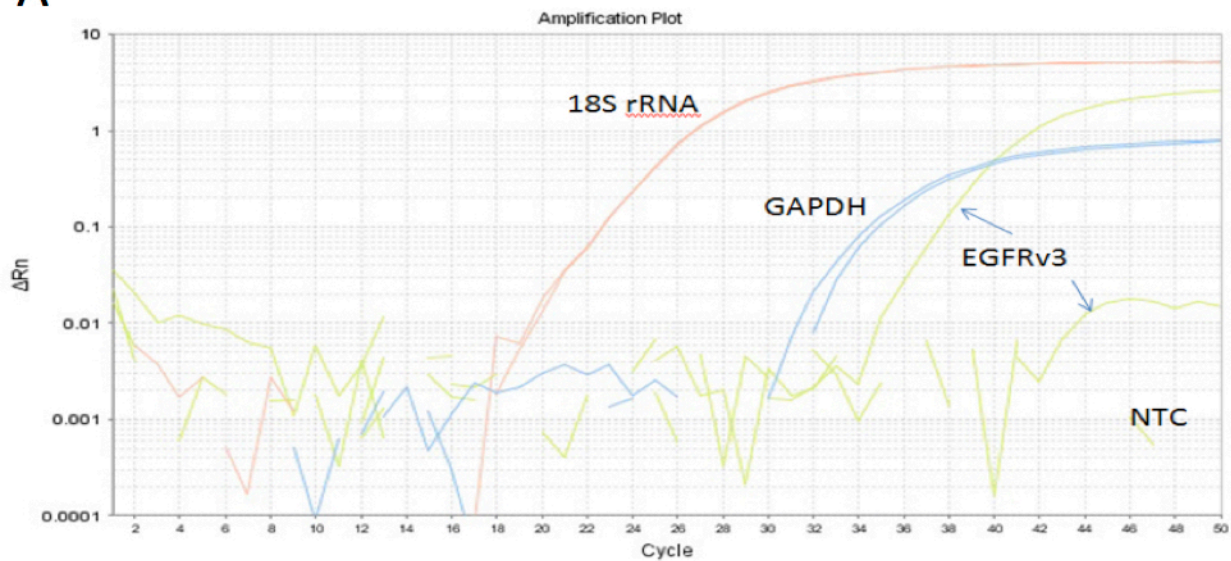**B**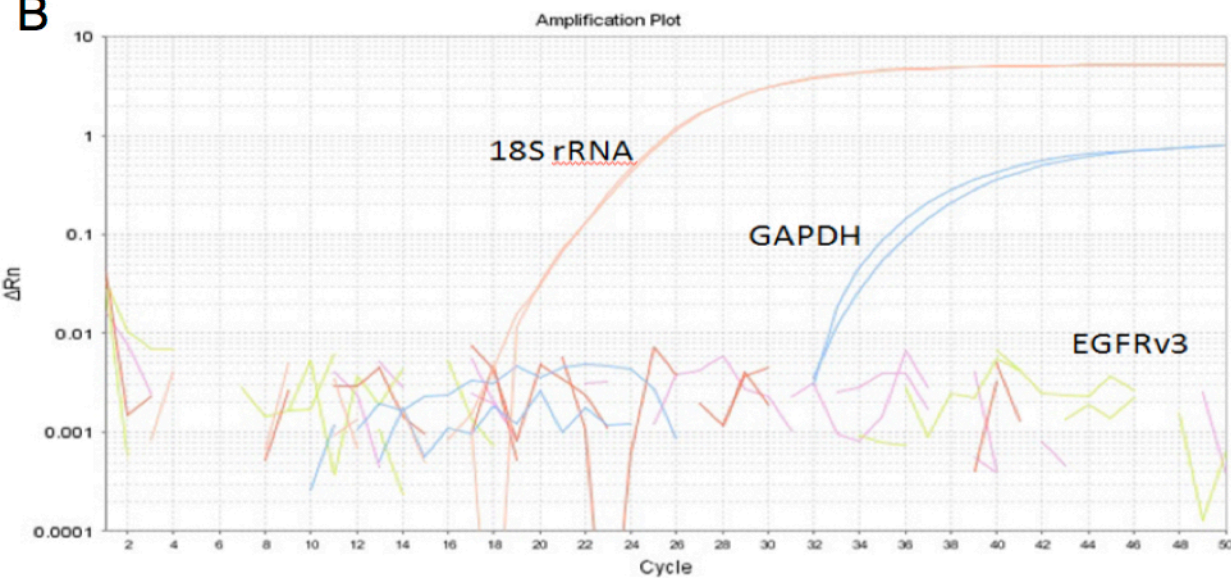

Supplement: nox085_suppl_supplemental_figure_1.pdf [file nox085_suppl_supplemental_figure_1.pdf]
